# Supplementary material for: Toward Universal Forward Genetics: Using a Draft Genome Sequence of the Nematode Oscheius tipulae To Identify Mutations Affecting Vulva Development
Source: PubMed Central journal article supplement (PMC5560785; doi:10.1534/genetics.117.203521), 2017-06-19

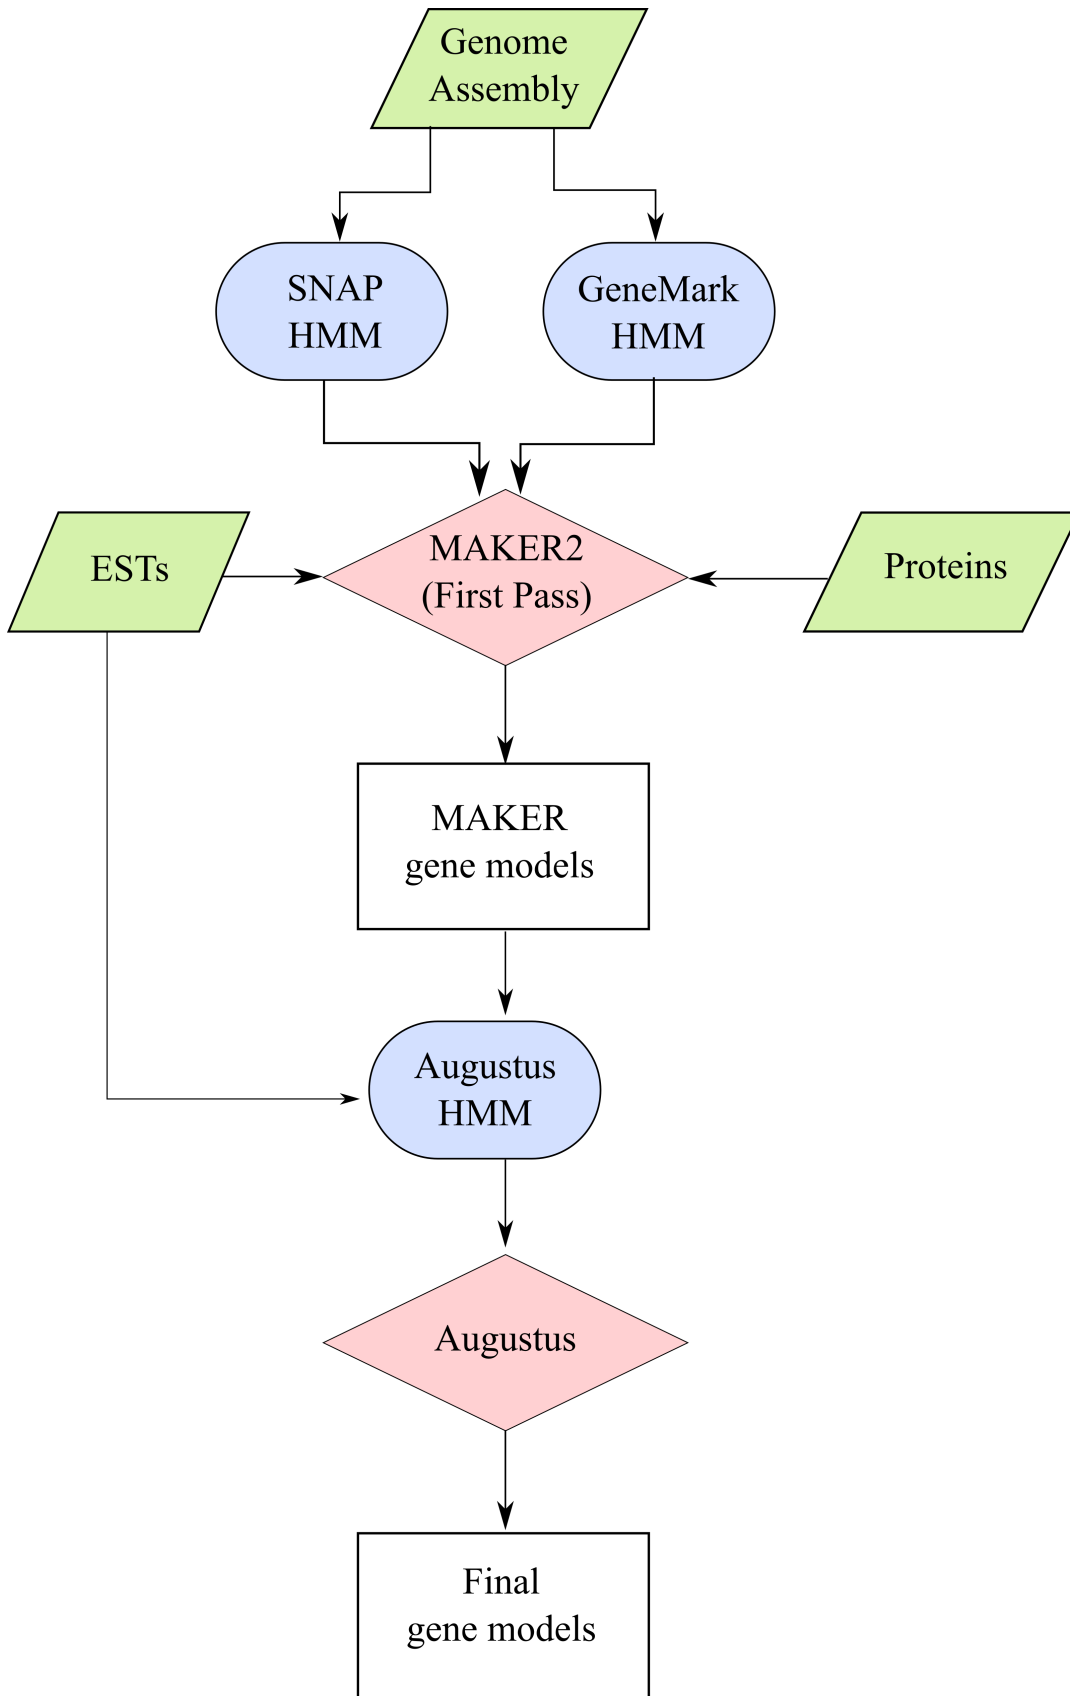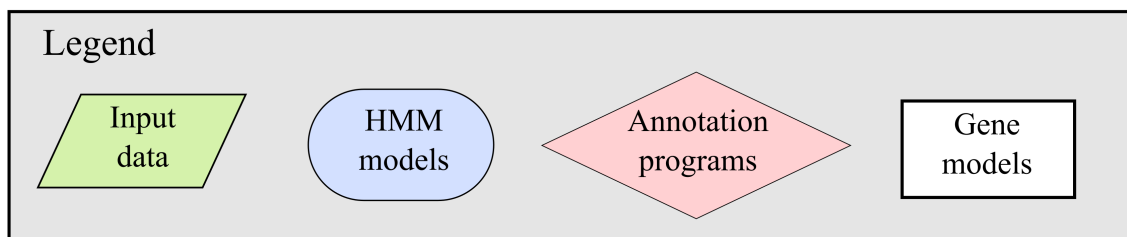

Supplement: 1747FigureS3.pdf [file 1747FigureS3.pdf]
