# Supplementary material for: Toward Universal Forward Genetics: Using a Draft Genome Sequence of the Nematode Oscheius tipulae To Identify Mutations Affecting Vulva Development
Source: PubMed Central journal article supplement (PMC5560785; doi:10.1534/genetics.117.203521), 2017-06-19
Supplement: 1747FigureS8.pdf [file 1747FigureS8.pdf]

# heatmap clustering of scaffolds

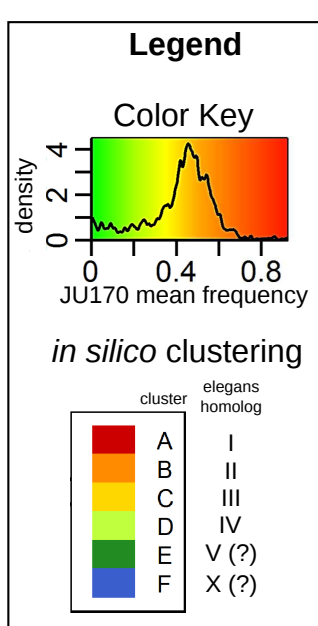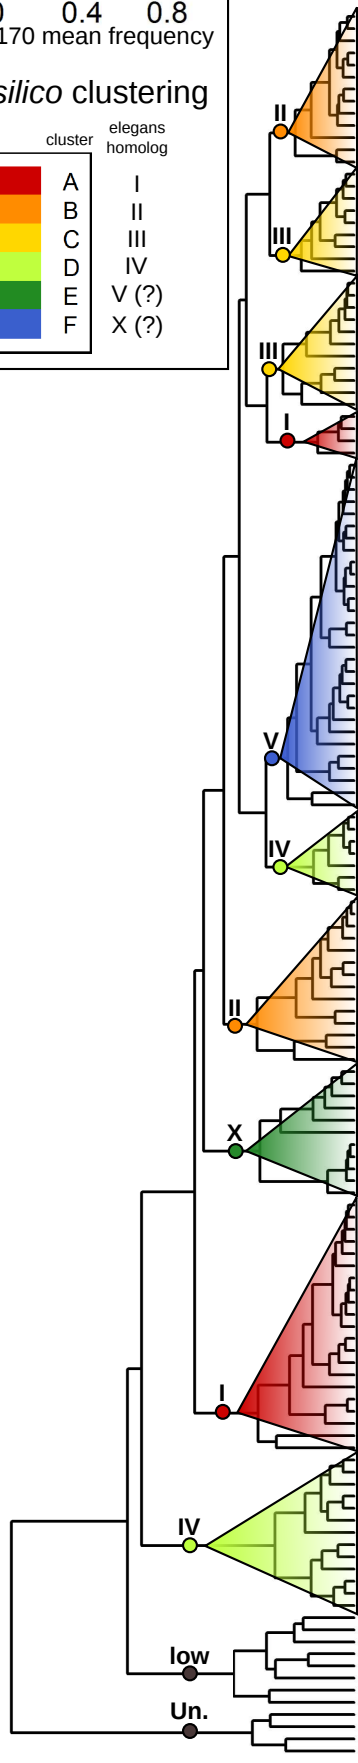

**Alleles**

*mutant gene*

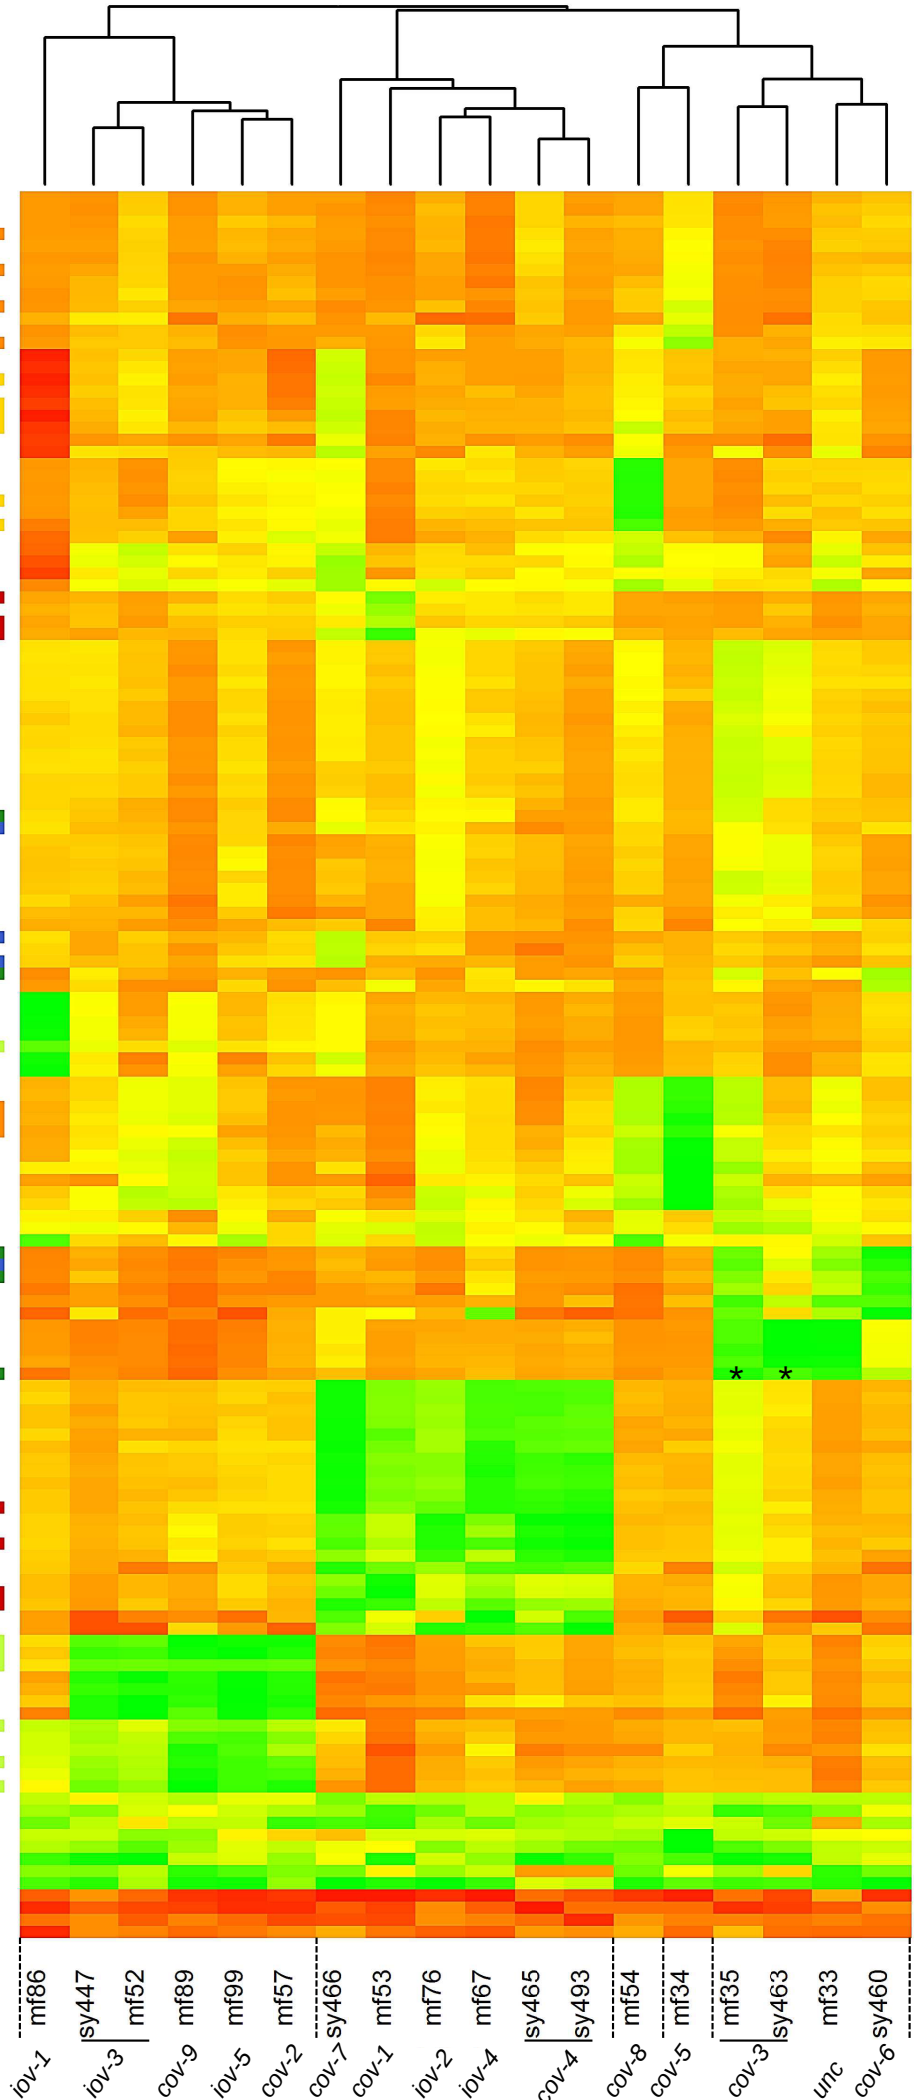

**Scaffolds**

s71  
s36  
s106  
s34  
s86  
s87  
s21  
s23  
s78  
s118  
s18  
s186  
s56  
s20  
s51  
s2  
s44  
s11  
s7  
s161  
s117  
s119  
s99  
s90  
s60  
s33  
s48  
s5  
s122  
s118  
s138  
s134  
s128  
s33  
s71  
s22  
s17  
s70  
s87  
s81  
s98  
s99  
s80  
s79  
s82  
s100  
s37  
s59  
s48  
s78  
s88  
s50  
s82  
s81  
s64  
s88  
s68  
s66  
s48  
s171  
s91  
s147  
s6  
s46  
s30  
s8  
s105  
s59  
s50  
s72  
s4  
s92  
s36  
s50  
s56  
s28  
s3  
s42  
s97  
s135  
s150  
s127  
s138  
s104  
s117  
s116  
s14  
s23  
s130  
s171  
s178  
s36  
s78  
s44  
s43  
s1  
s58  
s86  
s92  
s90  
s112  
s26  
s92  
s47  
s10  
s101  
s176  
s77  
s30  
s8  
s114  
s138  
s112  
s119  
s87  
s57  
s107  
s120  
s20  
s50  
s156  
s29  
s53  
s13  
s123  
s144  
s141  
s113  
s102  
s162  
s126  
s108  
s61  
s109  
s137

II  
III  
III  
I  
V  
IV  
II  
X  
I  
IV  
I  
IV  
FP  
Un.

mf86  
sy447  
mf52  
mf89  
mf99  
mf57  
sy466  
mf53  
mf76  
mf67  
sy465  
sy493  
mf54  
mf34  
mf35  
sy463  
mf33  
unc  
sy460
