# Supplementary material for: Toward Universal Forward Genetics: Using a Draft Genome Sequence of the Nematode Oscheius tipulae To Identify Mutations Affecting Vulva Development
Source: PubMed Central journal article supplement (PMC5560785; doi:10.1534/genetics.117.203521), 2017-06-19
Supplement: 1747TableS4.pdf [file 1747TableS4.pdf]

**Table S4: Software and command lines/main options**

| Tool Name     | Reference                                                                                                                                                                                  | Version               | Relevant Parameters                                                                                             |
|---------------|--------------------------------------------------------------------------------------------------------------------------------------------------------------------------------------------|-----------------------|-----------------------------------------------------------------------------------------------------------------|
| Cutadapt      | DOI:10.14806/ej.17.1.200                                                                                                                                                                   | v1.6                  | -O 5                                                                                                            |
| Trimmomatic   | <a href="https://doi.org/10.1093/bioinformatics/btu170">https://doi.org/10.1093/bioinformatics/btu170</a>                                                                                  | 0.32                  | LEADING:3 TRAILING:3 SLIDINGWINDOW:4:20 MINLEN:31                                                               |
| Quake         | DOI: 10.1186/gb-2010-11-11-r116                                                                                                                                                            | 0.3                   | -k 19                                                                                                           |
| CLC bio       | <a href="http://www.clcbio.com/products/clc-genomics-workbench/">http://www.clcbio.com/products/clc-genomics-workbench/</a>                                                                | 4.2.1                 |                                                                                                                 |
| blobtools     | <a href="https://doi.org/10.3389/fgene.2013.00237">https://doi.org/10.3389/fgene.2013.00237</a><br><a href="http://doi.org/10.5281/zenodo.177699">http://doi.org/10.5281/zenodo.177699</a> |                       |                                                                                                                 |
| bowtie2       | DOI: 10.1186/gb-2009-10-3-r25                                                                                                                                                              | 2.2.0                 |                                                                                                                 |
| samtools      | <a href="https://doi.org/10.1093/bioinformatics/btp352">https://doi.org/10.1093/bioinformatics/btp352</a>                                                                                  | 1.1 or later          |                                                                                                                 |
| ncbi-blast+   | DOI: 10.1186/1471-2105-10-421                                                                                                                                                              | 2.2.30                |                                                                                                                 |
| sga           | doi: 10.1101/gr.126953.111                                                                                                                                                                 | v.0.10.13             |                                                                                                                 |
| kmergenie     | <a href="https://doi.org/10.1093/bioinformatics/btt310">https://doi.org/10.1093/bioinformatics/btt310</a>                                                                                  | 1,6741                | -l 25 -s 2                                                                                                      |
| preqc         | arXiv:1307.8026                                                                                                                                                                            |                       |                                                                                                                 |
| ABYSS         | doi: 10.1101/gr.089532.108                                                                                                                                                                 | 1.5.2                 | k=69                                                                                                            |
| Velvet        | doi: 10.1101/gr.074492.107                                                                                                                                                                 | 1.2.10                | kmer size 69                                                                                                    |
| SPAdes        | doi:10.1089/cmb.2012.0021                                                                                                                                                                  | 3.1.1                 | --only-assembler --careful                                                                                      |
| SOAPdenovo    | DOI: 10.1186/2047-217X-1-18                                                                                                                                                                | v. r240               | pair_num_cutoff=5 map_len=35 -K=69 -R                                                                           |
| ALLPATHS-LG   | doi: 10.1073/pnas.1017351108                                                                                                                                                               | v. 50960              |                                                                                                                 |
| MaSuRCA       | <a href="https://doi.org/10.1093/bioinformatics/btt476">https://doi.org/10.1093/bioinformatics/btt476</a>                                                                                  | 2.3.2                 |                                                                                                                 |
| Ray           | doi:10.1089/cmb.2009.0238                                                                                                                                                                  | 2.3.1                 | -k 69                                                                                                           |
| REAPR         | DOI: 10.1186/gb-2013-14-5-r47                                                                                                                                                              | 1.0.17                |                                                                                                                 |
| ALE           | doi: 10.1093/bioinformatics/bts723                                                                                                                                                         | 20130717              |                                                                                                                 |
| CEGMA         | <a href="https://doi.org/10.1093/bioinformatics/btm071">https://doi.org/10.1093/bioinformatics/btm071</a>                                                                                  | 2,4                   |                                                                                                                 |
| RepeatModeler | <a href="http://www.repeatmasker.org/">http://www.repeatmasker.org/</a>                                                                                                                    | 1.0.8                 |                                                                                                                 |
| RepeatMasker  | <a href="http://www.repeatmasker.org/">http://www.repeatmasker.org/</a>                                                                                                                    | 4.0.3                 |                                                                                                                 |
| SNAP          | doi: 10.1186/1471-2105-5-59                                                                                                                                                                | 2013-11-29            |                                                                                                                 |
| GeneMark-ES   | doi: 10.1002/0471250953.bi0406s35                                                                                                                                                          | 2,3                   | --BP OFF -max_nnn 500                                                                                           |
| MAKER2        | DOI: 10.1186/1471-2105-12-491                                                                                                                                                              | 2,31                  |                                                                                                                 |
| Augustus      | doi: 10.1093/bioinformatics/btr010                                                                                                                                                         | 3.2.1                 | autoAug.pl with 3 rounds of training                                                                            |
| bwa           | <a href="https://doi.org/10.1093/bioinformatics/btp324">https://doi.org/10.1093/bioinformatics/btp324</a>                                                                                  | 0.7.12-r1044 or later | mem -aM                                                                                                         |
| Picard        | <a href="http://broadinstitute.github.io/picard/">http://broadinstitute.github.io/picard/</a>                                                                                              | 1.110 or later        | Tools: AddOrReplaceReadGroups + MarkDuplicates + BuildBamIndex                                                  |
| GATK          | DOI: 10.1002/0471250953.bi1110s43                                                                                                                                                          | 3.3-0 or later        | Tools: RealignerTargetCreator + IndelRealigner +BaseRecalibrator +AnalyzeCovariates+PrintReads+ HaplotypeCaller |
| FastQC        | <a href="http://www.bioinformatics.babraham.ac.uk/projects/fastqc/">http://www.bioinformatics.babraham.ac.uk/projects/fastqc/</a>                                                          | 0.11.1                | --nogroup                                                                                                       |
| Qualimap      | doi: 10.1093/bioinformatics/bts503                                                                                                                                                         | v2.0                  |                                                                                                                 |
| snpEff        | <a href="http://dx.doi.org/10.4161/fly.19695">http://dx.doi.org/10.4161/fly.19695</a>                                                                                                      | 4.1g or later         |                                                                                                                 |
| Tablet        | <a href="https://doi.org/10.1093/bib/bbs012">https://doi.org/10.1093/bib/bbs012</a>                                                                                                        | 1.14.04.10 or later   |                                                                                                                 |
| Jellyfish     | doi:10.1093/bioinformatics/btr011                                                                                                                                                          | 1.1.11                |                                                                                                                 |
| Orthofinder   | DOI: 10.1186/s13059-015-0721-2                                                                                                                                                             | 1.1.4                 | -l 3                                                                                                            |
